# Supplementary figures and images for: Molecular Classifiers for Gastric Cancer and Nonmalignant Diseases of the Gastric Mucosa
Source: Oxford University Press journal article supplement (doi:10.1158/0008-5472.can-03-1850), 2004-02-15

# $\beta$ -catenin expression

mRNA

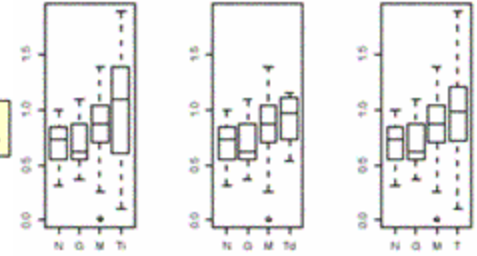

Protein

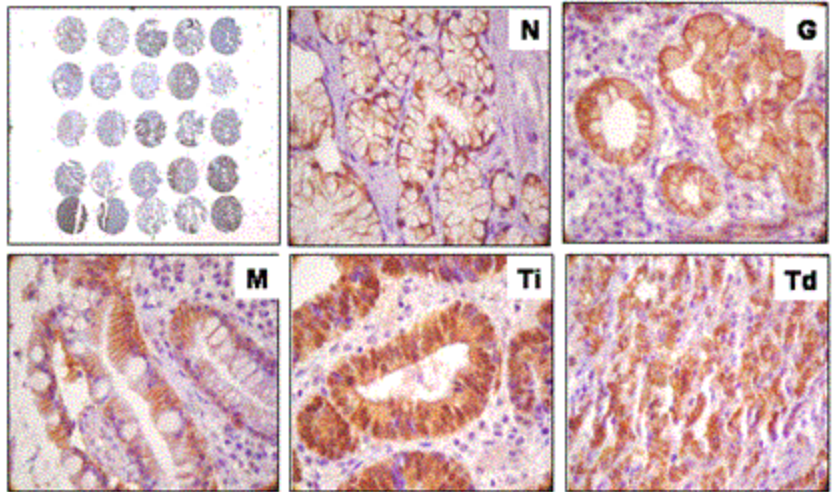

Supplement: 00085472can031850-sup-supplementary_figure_4.pdf [file 00085472can031850-sup-supplementary_figure_4.pdf]

Meireles et al, submitted: PCA

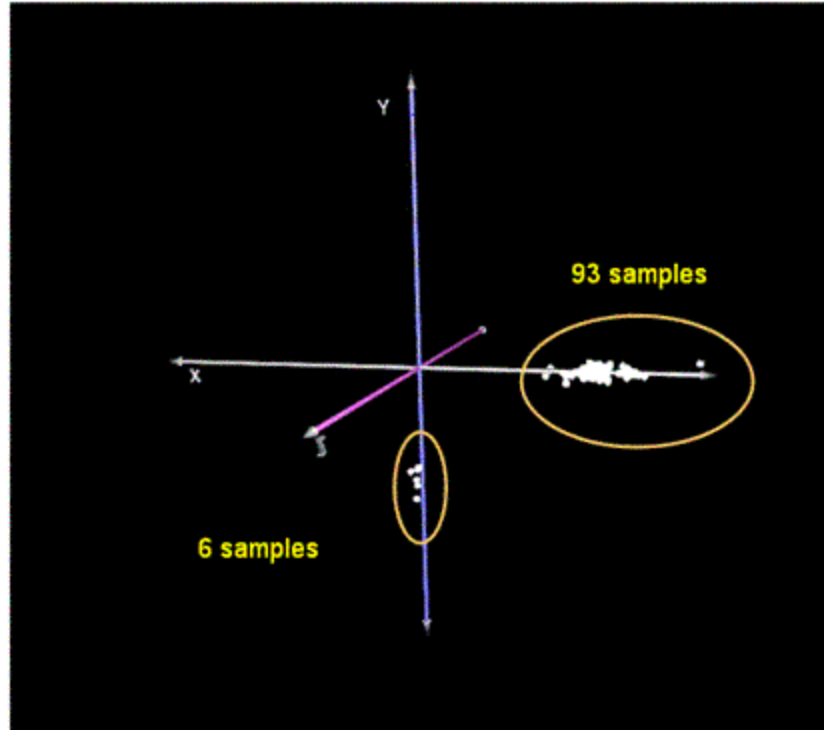

Supplement: 00085472can031850-sup-supplementary_figure_5.pdf [file 00085472can031850-sup-supplementary_figure_5.pdf]
